# Supplementary material for: GDHPM: A Geostatistical Disaggregation approach for generating hourly Precipitation in Mountainous regions preserving complex temporal patterns
Source: Copernicus journal article supplement (doi:10.5194/hess-2024-155), 2024-06-14
Supplement: Supplementary file 1 [file hess-2024-155-supplement.pdf]

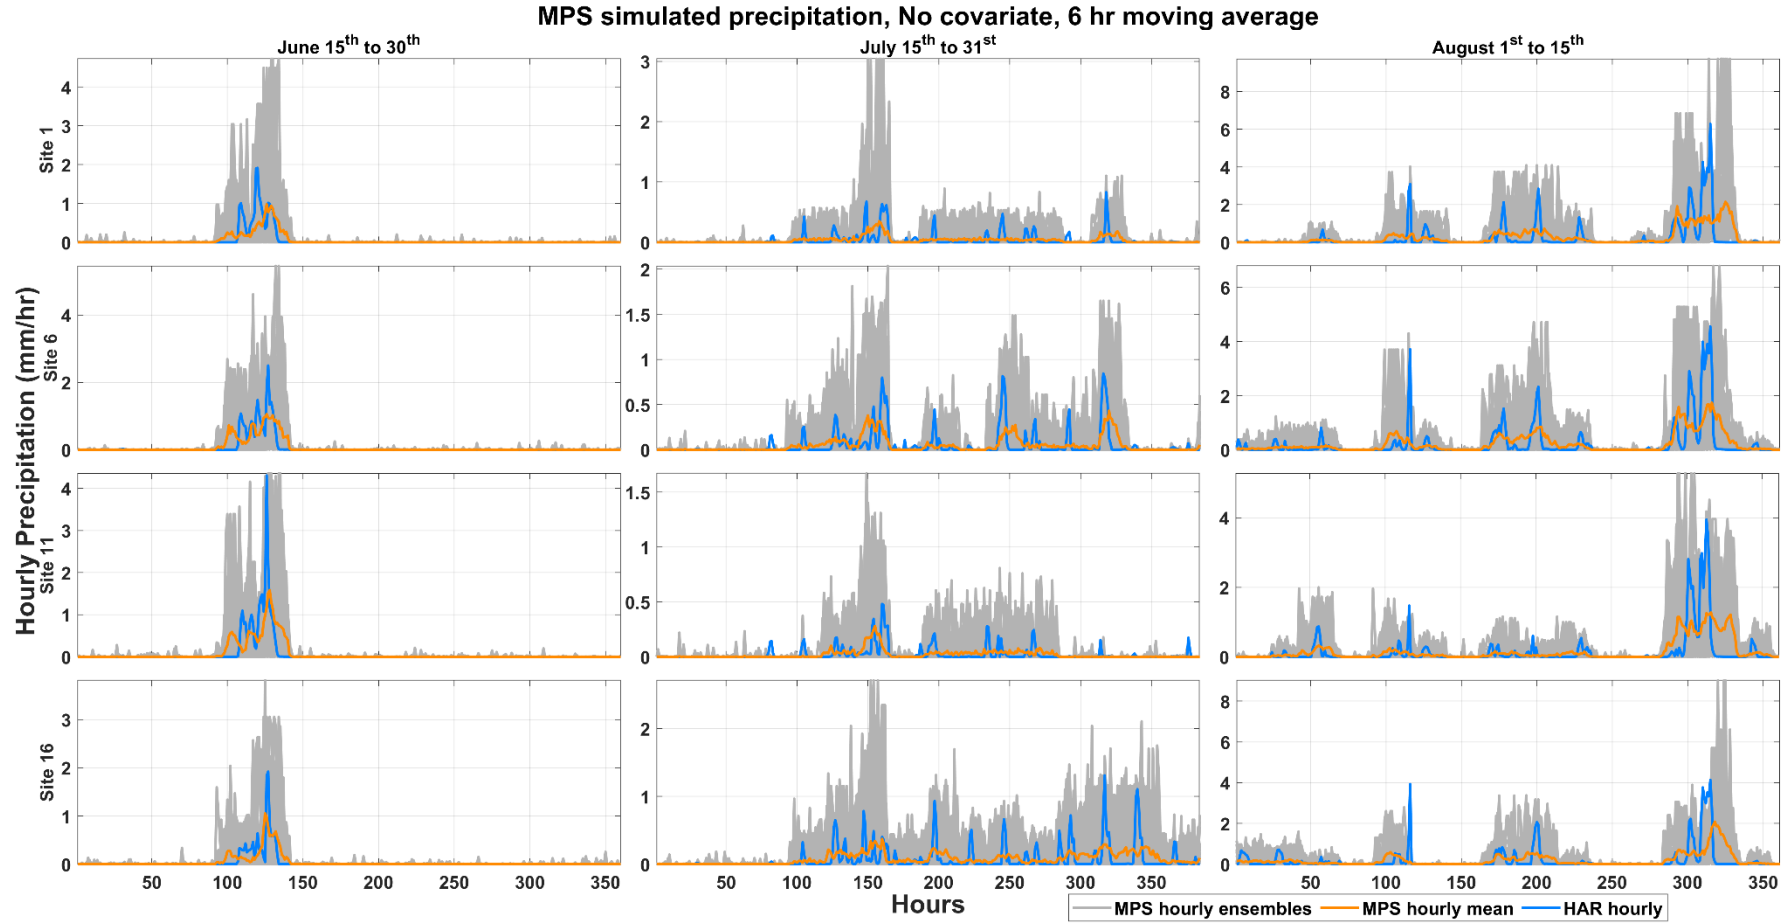

Figure S1. Hourly simulated precipitation for the monsoon season under experimental run E1\_R2 for four avalanche sites. Each subplot represents time series of the HAR hourly precipitation, MPS hourly precipitation with 50 ensembles and mean of the ensembles for a time period of June 15<sup>th</sup> to 30<sup>th</sup>, July 15<sup>th</sup> to 31<sup>st</sup>, and August 1<sup>st</sup> to 15<sup>th</sup>.

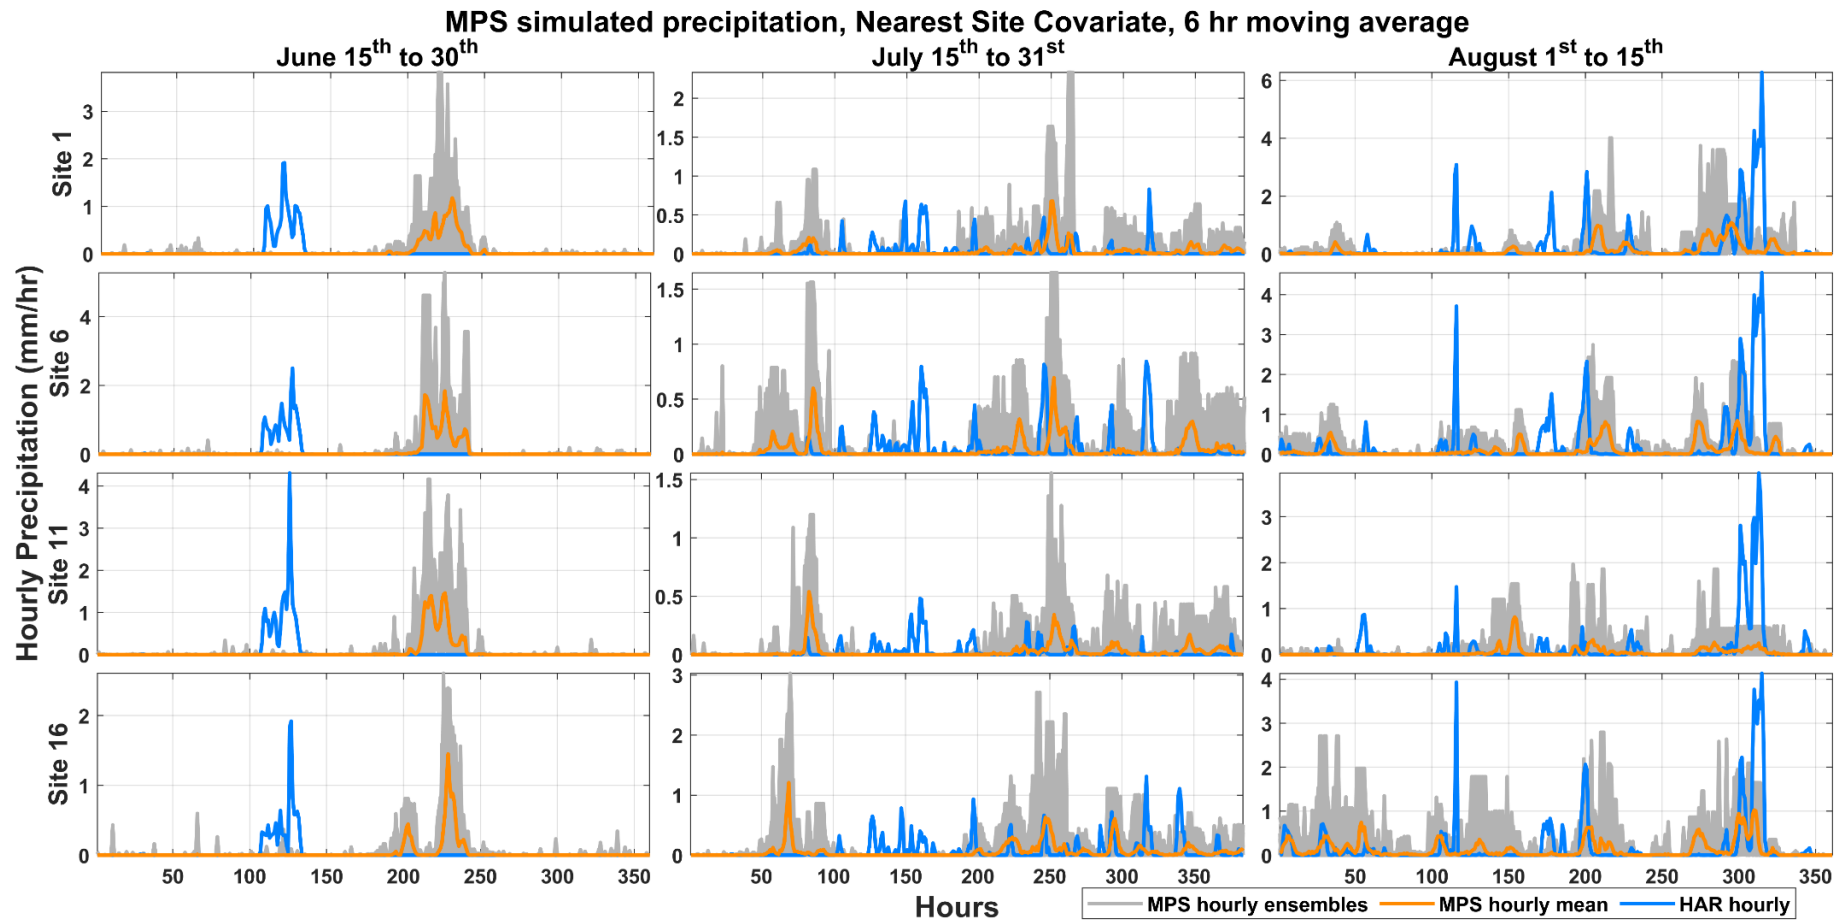

Figure S2. Hourly simulated precipitation for the monsoon season under experimental run E2\_R4 for four avalanche sites. Each subplot represents time series of the HAR hourly precipitation, MPS hourly precipitation with 50 ensembles and mean of the ensembles for a time period of June 15<sup>th</sup> to 30<sup>th</sup>, July 15<sup>th</sup> to 31<sup>st</sup>, and August 1<sup>st</sup> to 15<sup>th</sup>.

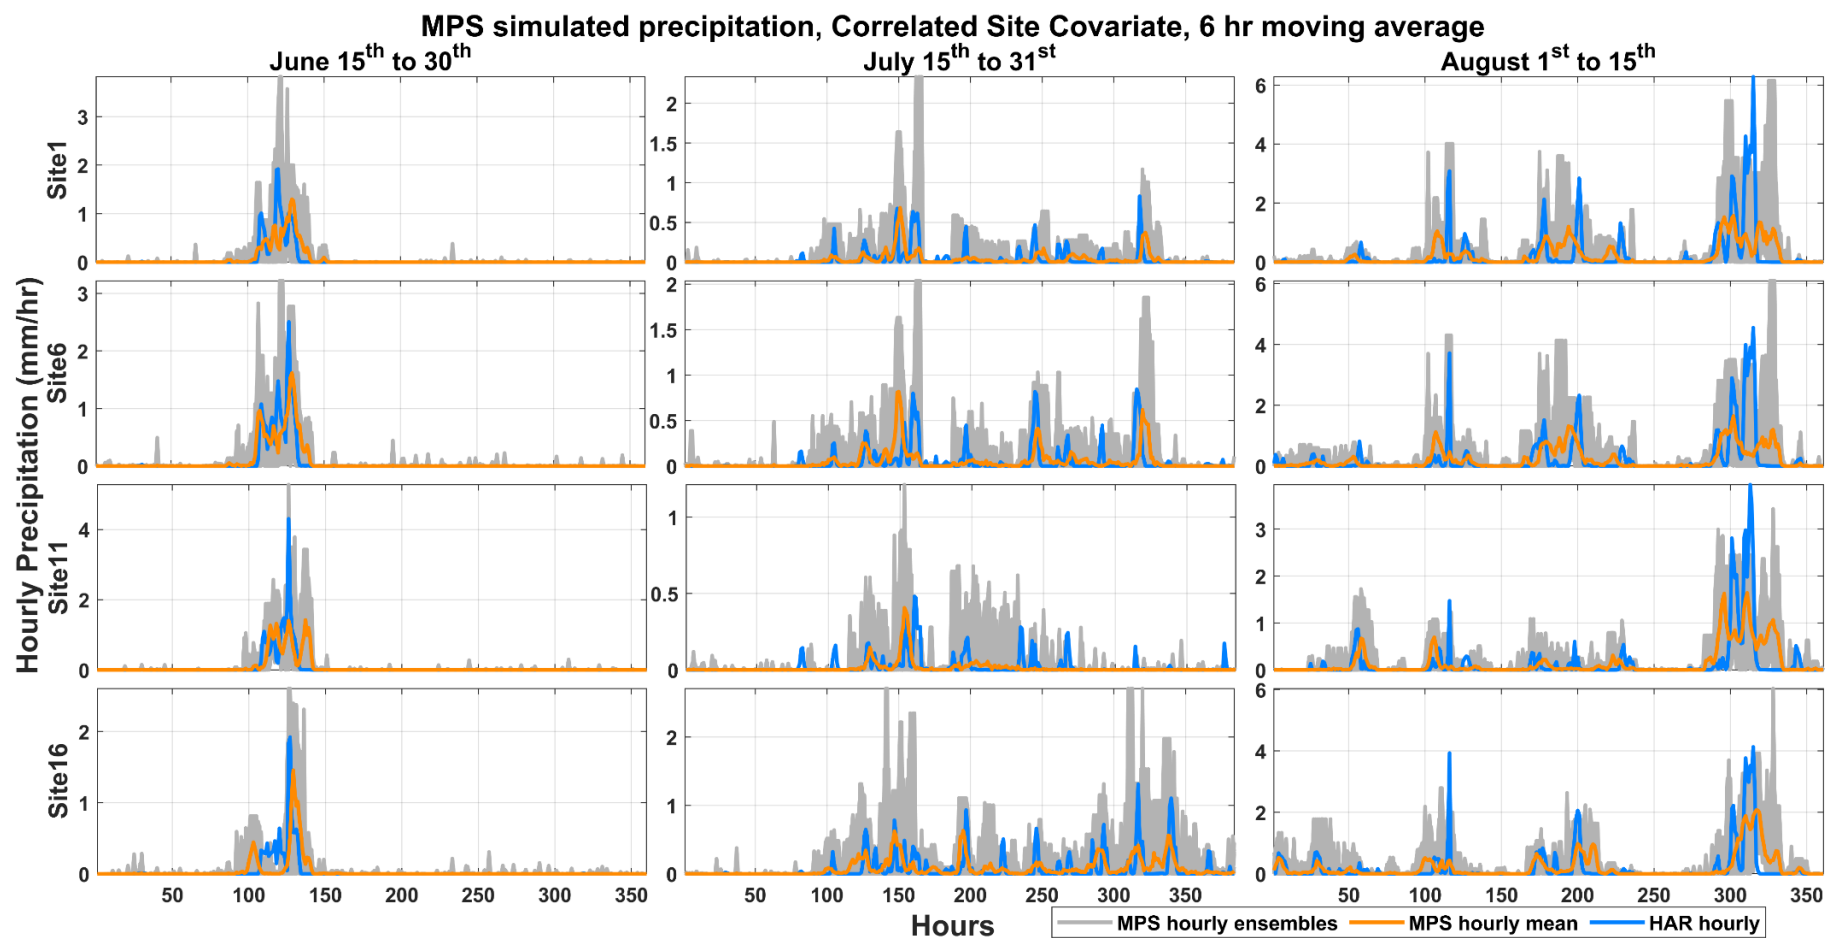

Figure S3. Hourly simulated precipitation for the monsoon season under experimental run E2\_R6 for four avalanche sites. Each subplot represents time series of the HAR hourly precipitation, MPS hourly precipitation with 50 ensembles and mean of the ensembles for a time period of June 15<sup>th</sup> to 30<sup>th</sup>, July 15<sup>th</sup> to 31<sup>st</sup>, and August 1<sup>st</sup> to 15<sup>th</sup>.

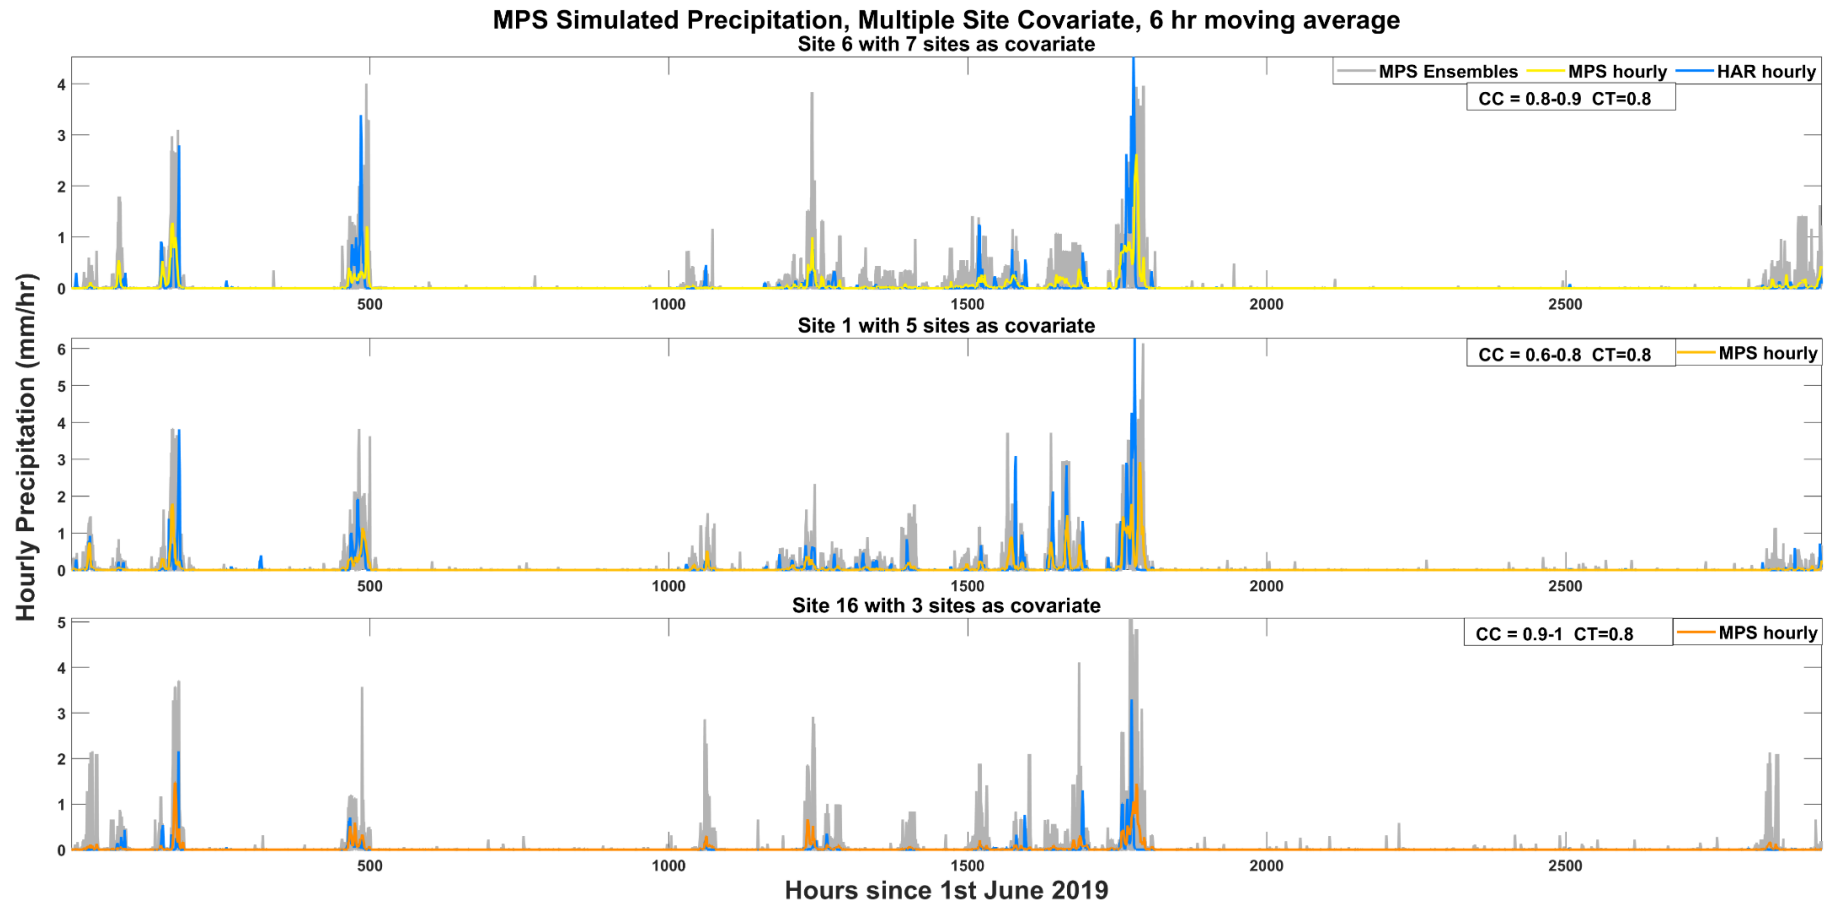

Figure S4. Hourly simulated precipitation for the monsoon season under experimental run E3\_R8, E3\_R10, and E3\_R12 for avalanche site\_6, site\_1, site\_16 respectively. Each subplot represents time series of the HAR hourly precipitation, MPS hourly precipitation with 50 ensembles and mean of the ensembles for a time period of 1<sup>st</sup> June 2019 to 30<sup>th</sup> September 2019.
